# Supplementary material
Source: publisher site journal article supplement (https://www.dovepress.com/article/309862)
Supplement: Supplementary file 1 [file get_supplementary_file.php]

**Demographic Characteristics and Treatment Patterns Among Patients Receiving Palbociclib for HR+/HER2− Advanced Breast Cancer: A Nationwide Real-World Experience**

**Supplementary tables**

**Supplementary Table 1** Demographic and clinical characteristics of patients treated with palbociclib during the named-patient reimbursement (May 1, 2017 – Oct 1, 2018) vs. regular reimbursement period (Oct 15, 2018 – June 30, 2019).

**Supplementary Table 2** Treatment patterns of patients receiving palbociclib therapy during the named-patient reimbursement (May 1, 2017 – Oct 1, 2018) vs. regular reimbursement period (Oct 15, 2018 – June 30, 2019).

**Supplementary Table 3** Polypharmacy in patients treated with palbociclib – The most frequently used top 20 ACT5 (Anatomical Therapeutic Chemical (ATC) classification system as recommended by the WHO) groups (>5 group) – 45 days before, ACT5 level.

**Supplementary Table 1** Demographic and clinical characteristics of patients treated with palbociclib during the NPBR (May 1, 2017 – Oct 1, 2018) vs. regular reimbursement period (Oct 15, 2018 – June 30, 2019). RR: regular reimbursement.

|  | **NPBR** | **RR** | **NPBR vs. RR** | **NPBR + RR** | **NPBR** | **RR** | **NPBR vs. RR** | **NPBR + RR** | **NPBR** | **RR** | **NPBR vs. RR** | **NPBR + RR** |
| --- | --- | --- | --- | --- | --- | --- | --- | --- | --- | --- | --- | --- |
|  | **PAL+AI** | **PAL+AI** |  | **PAL+AI** | **PAL+FUL** | **PAL+FUL** |  | **PAL+FUL** | **OVERALL** | **OVERALL** |  | **OVERALL** |
| **Total patients, n** | **180** | **219** |  | **399** | **280** | **283** |  | **563** | **460** | **502** |  | **962** |
| **Age at palbociclib initiation, years** |  |  |  |  |  |  |  |  |  |  |  |  |
| Median | 60.0 | 63.0 |  | 61.0 | 63.0 | 64.0 |  | 63.0 | 62.0 | 64.0 |  | 62.0 |
| Mean (95%CI) | 58.8  (57.1-60.4) | 61.2  (59.6-62.8) | p=0.0506 | 59.3  (58.1-60.4) | 61.1  (59.8-62.4) | 63.6  (62.4-64.8) | p=0.0082 | 61.6  (60.7-62.5) | 60.2  (59.2-61.2) | 62.6  (61.6-63.5) | p=0.0016 | 60.6  (59.9-61.3) |
| **Menopause status, n (%)** |  |  | p=0.3953 |  |  |  | p=0.0269 |  |  |  | p=0.621 |  |
| Pre/perimenopausal | 27 (15%) | 41 (19%) |  | 68 (17%) | 30 (11%) | 15 (5%) |  | 45 (8%) | 57 (12%) | 56 (11%) |  | 113 (12%) |
| Postmenopausal | 153 (85%) | 178 (81%) |  | 331 (83%) | 250 (89%) | 268 (95%) |  | 518 (92%) | 403 (88%) | 446 (89%) |  | 849 (88%) |
| **Stage at palbociclib initiation, n (%)** |  |  | p=0.1247 |  |  |  | p=0.5942 |  |  |  | p=0.1296 |  |
| Locally advanced | 38 (21%) | 62 (28%) |  | 100 (25%) | 61 (22%) | 68 (24%) |  | 129 (23%) | 99 (22%) | 130 (26%) |  | 229 (24%) |
| Metastatic | 142 (79%) | 157 (72%) |  | 299 (75%) | 219 (78%) | 215 (76%) |  | 434 (77%) | 361 (78%) | 372 (74%) |  | 733 (76%) |
| **Occurrence of stage IV breast cancer, n (%)** |  |  | p<0.0001 |  |  |  | p=0.2339 |  |  |  | p<0.0001 |  |
| 'De novo' | 18 (10%) | 57 (26%) |  | 75 (19%) | 0 (0%) | <10 (1%) |  | <10 (1%) | 18 (4%) | 60 (12%) |  | 78 (8%) |
| 'Recurrent' | 162 (90%) | 162 (74%) |  | 324 (81%) | 280 (100%) | 280 (99%) |  | 560 (99%) | 442 (96%) | 442 (88%) |  | 884 (92%) |
| **Metastatic sites, n (%)** | 142 (100%) | 157 (100%) | p=0.491* | 299 (100%) | 219 (100%) | 215 (100%) | p=0.6253* | 434 (100%) | 361 (100%) | 372 (100%) | p=0.4579* | 733 (100%) |
| Non-visceral (bone only) | 94 (66%) | 104 (66%) |  | 198 (66%) | 122 (56%) | 129 (60%) |  | 251 (58%) | 216 (60%) | 233 (63%) |  | 449 (61%) |
| Visceral | 43 (30%) | 43 (27%) |  | 86 (29%) | 83 (38%) | 72 (33%) |  | 155 (36%) | 126 (35%) | 115 (31%) |  | 241 (33%) |
| Visceral (liver) | 25 (58%) | 22 (51%) |  | 47 (55%) | 39 (47%) | 25 (35%) |  | 64 (41%) | 64 (51%) | 47 (41%) |  | 111 (46%) |
| Visceral (lung/pleura) | 20 (47%) | 24 (56%) |  | 44 (51%) | 55 (66%) | 46 (64%) |  | 101 (65%) | 75 (60%) | 70 (61%) |  | 145 (60%) |
| Visceral (CNS) | <10 | <10 |  | <10 | <10 (11%) | 10 (14%) |  | 19 (12%) | 13 (10%) | 15 (13%) |  | 28 (12%) |
| Visceral (ovarium) | <10 | <10 |  | <10 | <10 | <10 |  | <10 | <10 | <10 |  | <10 |
| Other | <10 | <10 |  | 10 (3%) | <10 | 10 (5%) |  | 16 (4%) | <10 | 17 (5%) |  | 26 (4%) |
| Unknown | <10 | <10 |  | <10 | 14 (4%) | <10 |  | 12 (3%) | 19 (3%) | <10 |  | 17 (2%) |
| **Prior therapy for eBC, n (%)** | 86  (100%) | 90  (100%) | p=0.2163 | 176 (100%) | 168 (100%) | 173 (100%) | p=0.8507 | 341 (100%) | 254 (100%) | 263 (100%) | p=0.4158 | 517 (100%) |
| Neoadjuvant CT | 16 (19%) | 19 (21%) | p=0.82 | 35 (20%) | 30 (18%) | 30 (17%) | p=1 | 60 (17%) | 46 (18%) | 49 (19%) | p=0.9686 | 95 (18%) |
| Adjuvant CT | 35 (41%) | 37 (41%) | p=1 | 72 (41%) | 85 (51%) | 84 (49%) | p=0.7884 | 169 (50%) | 120 (47%) | 121 (46%) | p=0.8465 | 241 (47%) |
| Adjuvant ET | 62 (72%) | 62 (69%) | p=0.7638 | 124 (70%) | 126 (75%) | 145 (84%) | p=0.06 | 271 (79%) | 188 (74%) | 207 (79%) | p=0.2492 | 395 (76%) |
| Radiotherapy | 43 (50%) | 37 (41%) | p=0.3019 | 80 (45%) | 107 (64%) | 120 (69%) | p=0.3195 | 227 (67%) | 150 (59%) | 157 (60%) | p=0.9532 | 307 (59%) |
| Surgery | 62 (72%) | 62 (69%) | p=0.7638 | 124 (70%) | 140 (83%) | 146 (84%) | p=0.9055 | 286 (84%) | 202 (80%) | 208 (79%) | p=0.9881 | 410 (79%) |
| **Line of treatment at palbociclib initiation, n (%)** |  |  | p=0.5442** |  |  |  | p=0.1457** |  |  |  | p=0.0384** |  |
| 1st line | 117(65%) | 151 (69%) |  | 268 (67%) | 103 (37%) | 117 (41%) |  | 220 (39%) | 220 (48%) | 268 (53%) |  | 488 (51%) |
| 2nd line | 36 (20%) | 44 (20%) |  | 80 (20%) | 89 (32%) | 103 (36%) |  | 192 (34%) | 125 (27%) | 147 (29%) |  | 272 (28%) |
| 3rd line | 17 (9%) | 12 (5%) |  | 29 (7%) | 52 (19%) | 38 (13%) |  | 90 (16%) | 69 (15%) | 50 (10%) |  | 119 (12%) |
| 4th line | <10 | <10 |  | 11 (3%) | 20 (7%) | 11 (4%) |  | 31 (5%) | 26 (6%) | 16 (3%) |  | 42 (5%) |
| >4th line | <10 | <10 |  | <10 | <10 | <10 |  | 15 (3%) | 12 (3%) | <10 |  | 20 (2%) |
| Unknown | <10 | <10 |  | <10 | 16 (6%) | 14 (5%) |  | 15 (3%) | <10 | 13 (3%) |  | 21 (2%) |
| **Prior therapies for ABC before palbociclib initiation, n (%)** | 62  (100%) | 63  (100%) | p=0.2678 | 125 (100%) | 170 (100%) | 158 (100%) | p=0.2759 | 328 (100%) | 232 (100%) | 221 (100%) | p=0.0542 | 453 (100%) |
| Endocrine | 40 (65%) | 41 (65%) | p=1 | 81 (65%) | 152 (89%) | 142 (90%) | p=1 | 294 (90%) | 192 (83%) | 183 (83%) | p=1 | 375 (83%) |
| Chemotherapy | 41 (66%) | 39 (62%) | p=0.7599 | 80 (64%) | 91 (54%) | 71 (45%) | p=0.1485 | 162 (49%) | 132 (57%) | 110 (50%) | p=0.1542 | 242 (53%) |
| Targeted (everolimus) | <10 | <10 |  | <10 | 21 (12%) | 11 (7%) | p=0.1449 | 32 (10%) | 26 (11%) | 14 (6%) | p=0.0967 | 40 (9%) |
| Other | <10 | <10 |  | <10 | <10 | <10 |  | <10 | <10 | <10 |  | 12 (3%) |

*bone only, visceral and merged other and unknown

** >4th line and unknown merged

Mean age was compared by Welch-test, proportions were compared by chi-squared test (with simulated p-values if any expected number was less than five).

CNS: central nervous system; CT: chemotherapy; ET: endocrine therapy; NPBR: named-patient based reimbursement; RR: regular reimbursement; PAL+AI: palbociclib plus aromatase inhibitor; PAL+FUL: palbociclib plus fulvestrant.

**Supplementary Table 2** Treatment patterns of patients receiving palbociclib therapy during the NPBR (May 1, 2017 – Oct 1, 2018) vs. regular reimbursement period (Oct 15, 2018 – June 30, 2019). RR: regular reimbursement.

|  | **NPBR** | **RR** | **NPBR vs. RR** | **NPBR + RR** | **NPBR** | **RR** | **NPBR vs. RR** | **NPBR + RR** | **NPBR** | **RR** | **NPBR vs. RR** | **NPBR + RR** |
| --- | --- | --- | --- | --- | --- | --- | --- | --- | --- | --- | --- | --- |
|  | **PAL+AI** | **PAL+AI** |  | **PAL+AI** | **PAL+FUL** | **PAL+FUL** |  | **PAL+FUL** | **OVERALL** | **OVERALL** |  | **OVERALL** |
| **Total patients, n** | **180** | **219** |  | **399** | **280** | **283** |  | **563** | **460** | **502** |  | **962** |
| **Combination endocrine partner*, n (%)** |  |  | p=0.3203 |  |  |  |  |  |  |  | p=0.2449 |  |
| Letrozole | 166 (92%) | 193 (88%) |  | 359 (90%) | - | - |  | - | 166 (36%) | 193 (38%) |  | 359 (37%) |
| Anastrozole | <10 | <10 |  | 11 (3%) | - | - |  | - | <10 | <10 |  | 11 (1%) |
| Exemestane | 12 (7%) | 20 (9%) |  | 32 (8%) | - | - |  | - | 12 (3%) | 20 (4%) |  | 32 (3%) |
| Fulvestrant | - | - |  | - | 280 (100%) | 283 (100%) |  | 563 (100%) | 280  (61%) | 283  (56%) |  | 563  (59%) |
| **Follow up of palbociclib treated patients on 30 June 2019** |  |  | p=0.0005 |  |  |  | p=0.0005 |  |  |  | p=0.0005 |  |
| Palbociclib treatment is ongoing | 98 (54%) | 172 (79%) |  | 270 (68%) | 79 (28%) | 166 (59%) |  | 245 (44%) | 177 (38%) | 338 (67%) |  | 515 (54%) |
| Switch to next therapy | 52 (29%) | 17 (8%) |  | 69 (17%) | 124 (44%) | 33 (12%) |  | 157 (28%) | 176 (38%) | 50 (10%) |  | 226 (23%) |
| Continuation of endocrine therapy without palbociclib | 17 (9%) | 16 (7%) |  | 33 (8%) | 46 (16%) | 69 (24%) |  | 115 (20%) | 63 (14%) | 85 (17%) |  | 148 (15%) |
| No therapy for breast cancer and alive | <10 | <10 |  | <10 | <10 | <10 |  | <10 | <10 | <10 |  | 15 (2%) |
| No therapy for breast cancer and died | 10 (6%) | 10 (5%) |  | 20 (5%) | 27 (10%) | 11 (4%) |  | 38 (7%) | 37 (8%) | 21 (4%) |  | 58 (6%) |
| **Next therapy following palbociclib** | 52  (100%) | 17  (100%) | p=0.2549 | 69  (100%) | 124 (100%) | 33  (100%) | p=1 | 157 (100%) | 176 (100%) | 50  (100%) | p=0.5447 | 226 (100%) |
| Endocrine therapy | 28 (54%) | 12 (71%) |  | 40 (58%) | 51 (41%) | 14 (42%) |  | 65 (41%) | 79 (45%) | 26 (52%) |  | 105 (46%) |
| Chemotherapy | 24 (46%) | <10 |  | 30 (43%) | 74 (60%) | 19 (58%) |  | 93 (59%) | 98 (56%) | 24 (48%) |  | 123 (54%) |
| **Starting dose: 125 mg, n (%)** | 179 (99%) | 212 (97%) | p=0.0070 | 391 (98%) | 280 (100%) | 270 (95%) | p<0.0001 | 550 (98%) | 459 (100%) | 482 (96%) | p<0.0001 | 941 (98%) |
| No dose reduction | 130 (73%) | 136 (64%) |  | 266 (68%) | 216 (77%) | 161 (60%) |  | 377 (69%) | 346 (75%) | 297 (62%) |  | 643 (68%) |
| Only one prescription claim | <10 | 18 (8%) |  | 20 (5%) | <10 | 39 (14%) |  | 47 (9%) | 10 (2%) | 57 (12%) |  | 67 (7%) |
| Dose reduced to 100 mg | 33 (18%) | 45 (21%) |  | 78 (20%) | 34 (12%) | 50 (19%) |  | 84 (15%) | 67 (15%) | 95 (20%) |  | 162 (17%) |
| Dose reduced to 75 mg | 14 (8%) | 13 (6%) |  | 27 (7%) | 22 (8%) | 20 (7%) |  | 42 (7%) | 36 (8%) | 33 (7%) |  | 69 (7%) |

Proportions were compared by chi-squared test (with simulated p-values if any expected number was less than five).

CNS: central nervous system; CT: chemotherapy; ET: endocrine therapy; NPBR: named-patient based reimbursement; RR: regular reimbursement; PAL+AI: palbociclib plus aromatase inhibitor; PAL+FUL: palbociclib plus fulvestrant.

**Supplementary Table 3** Polypharmacy in patients treated with palbociclib – The most frequently used top 20 ACT5 groups (>5 group) – 45 days before, ATC5 level.

| **ATC5 group name** | **PAL+AI** | **PAL+FUL** | **OVERALL** |
| --- | --- | --- | --- |
| **Total patients, n (%)** | **222** | **333** | **555** |
| Bisphosphonates (M05BA) | 146 (66%) | 181 (54%) | 327 (59%) |
| Vitamin D and analogues (A11CC) | 106 (48%) | 159 (48%) | 265 (48%) |
| proton pump inhibitors (A02BC) | 90 (41%) | 127 (38%) | 217 (39%) |
| Selective beta blocking agents (C07AB) | 81 (36%) | 126 (38%) | 207 (37%) |
| Calcium (A12AA) | 74 (33%) | 92 (28%) | 166 (30%) |
| Other opioids (N02AX) | 67 (30%) | 93 (28%) | 160 (29%) |
| Heparin group (B01AB) | 56 (25%) | 79 (24%) | 135 (24%) |
| ACE inhibitors, plain (C09AA) | 50 (23%) | 66 (20%) | 116 (21%) |
| Potassium (A12BA) | 49 (22%) | 63 (19%) | 112 (20%) |
| ACE inhibitors and diuretics (C09BA) | 50 (23%) | 61 (18%) | 111 (20%) |
| H2-receptor antagonist (A02BA) | 50 (23%) | 59 (18%) | 109 (20%) |
| Sulphonamides, plain (C03CA) | 42 (19%) | 66 (20%) | 108 (19%) |
| Acetic acid derivates and related substances (M01AB) | 45 (20%) | 62 (19%) | 107 (19%) |
| Fluoroquinolones (J01MA) | 43 (19%) | 61 (18%) | 104 (19%) |
| HMG CoA reductase inhibitors (C10AA) | 40 (18%) | 64 (19%) | 104 (19%) |
| Platelet aggregation inhibitors including heparin (B01AC) | 44 (20%) | 59 (18%) | 103 (19%) |
| Combinations of penicillins, including beta-lactamase inhibitors (J01CR) | 41 (18%) | 60 (18%) | 101 (18%) |
| Preparations inhibiting uric acid production (M04AA) | 35 (16%) | 52 (16%) | 87 (16%) |
| Glucocorticoids (H02AB) | 32 (14%) | 55 (17%) | 87 (16%) |
| Dihydropyridine derivates (C08CA) | 31 (14%) | 49 (15%) | 80 (14%) |

PAL+AI: palbociclib plus aromatase inhibitor; PAL+FUL: palbociclib plus fulvestrant

Reference:

1. WHO Collaborating Centre for Drug Statistics Methodology, Oslo, Norway (2011). Available at: http://www.whocc.no [accessed August 5, 2020]
